# Supplementary material
Source: PubMed Central journal article supplement (PMC6533161)
Supplement: NIHMS1017613-supplement-1.pdf [file NIHMS1017613-supplement-1.pdf]

Online supplements

*Post hoc* power was calculated in the following way: given an estimate of the parameter ( $b$ ) and its standard error ( $se$ ), and under the assumption of normal distribution of the estimate (with mean  $b$  and standard deviation  $se$ ), the power is equal to the probability of the estimate being higher than  $1.96*se$  or lower than  $-1.96*se$ . The formula is:  $1-\Phi((1.96*se-b)/se)+\Phi((-1.96*se-b)/se)$ , where  $\Phi$  is the cumulative distribution function of the standard Normal distribution. The results of the power calculations are as follows:

| Effect                                                                                                | P value | <i>Post hoc</i> power analyses |
|-------------------------------------------------------------------------------------------------------|---------|--------------------------------|
| Moderating effect of therapists' alliance sudden gains on the treatment condition-outcome association | .005    | .805                           |
| Effect of therapists' alliance sudden gains on outcome in CBT                                         | .06     | .487                           |
| Effect of therapists' alliance sudden gains on outcome in AFT                                         | .03     | .548                           |
| Moderating effect of patients' alliance sudden gains on the treatment condition-outcome association   | .28     | .192                           |
